# Supplementary material for: Adherence to the Mediterranean Diet, Sodium and Potassium Intake in People at a High Risk of Dementia
Source: MDPI journal article supplement (doi:10.3390/nu16101419), 2024-05-08
Supplement: s1 [file s1]

**Table S1.** Descriptive statistics of estimated nutrient intake (sodium and potassium) and molar Na/K ratio in 169 Portuguese adults at high risk for dementia from the MIND-Matosinhos study (2020–2023).

| <b>Sodium Intake (mg/day)</b>    |                |              |              |
|----------------------------------|----------------|--------------|--------------|
|                                  | <b>Overall</b> | <b>Women</b> | <b>Men</b>   |
| Median ± IQR                     | 3210 ± 1453    | 2831* ± 1264 | 3564* ± 1377 |
| Minimum                          | 1289           | 1289         | 1340         |
| Maximum                          | 7052           | 7052         | 6293         |
| Percentile 25                    | 2502           | 2325         | 3109         |
| Percentile 75                    | 3955           | 3589         | 4486         |
| <b>Potassium Intake (mg/day)</b> |                |              |              |
|                                  | <b>Overall</b> | <b>Women</b> | <b>Men</b>   |
| Median ± IQR                     | 3150 ± 1256    | 2983* ± 1200 | 3388* ± 1160 |
| Minimum                          | 1114           | 1114         | 1378         |
| Maximum                          | 6073           | 6073         | 6048         |
| Percentile 25                    | 2634           | 2396         | 2955         |
| Percentile 75                    | 3890           | 3596         | 4115         |
| <b>Na/K Ratio</b>                |                |              |              |
|                                  | <b>Overall</b> | <b>Women</b> | <b>Men</b>   |
| Median ± IQR                     | 1.69 ± 0.71    | 1.66 ± 0.80  | 1.85 ± 0.70  |
| Minimum                          | 0.66           | 0.72         | 0.66         |
| Maximum                          | 3.48           | 3.48         | 3.02         |
| Percentile 25                    | 1.40           | 1.29         | 1.47         |
| Percentile 75                    | 2.11           | 2.08         | 2.17         |

IQR: Interquartile range. \* The medians were statistically different by sex.

**Table S2.** Descriptive statistics of MEDAS score in 169 Portuguese adults at high-risk for dementia from the MIND-Matosinhos study (2020–2023).

| <b>Adherence to the Mediterranean Diet (MEDAS Score)</b> |                |              |             |
|----------------------------------------------------------|----------------|--------------|-------------|
|                                                          | <b>Overall</b> | <b>Women</b> | <b>Men</b>  |
| Mean ± SD                                                | 7.91 ± 1.78    | 8.08 ± 1.64  | 7.64 ± 1.96 |
| Minimum                                                  | 3              | 4            | 3           |
| Maximum                                                  | 12             | 12           | 12          |
| Percentile 25                                            | 7              | 7            | 6           |
| Percentile 75                                            | 9              | 9            | 9           |

SD: Standard deviation.
